# Supplementary material for: Rates of Response to Atogepant for Migraine Prophylaxis Among Adults: A Secondary Analysis of a Randomized Clinical Trial
Source: PubMed Central journal article supplement — JAMA Netw Open. 2022 Jun 8;5(6):e2215499. doi: 10.1001/jamanetworkopen.2022.15499 (PMC9178435; doi:10.1001/jamanetworkopen.2022.15499), 2022-06-08
Supplement: jamanetwopen-e2215499-s00.pdf [file jamanetwopen-e2215499-s00.pdf]

## Data Sharing Statement

Lipton. Rates of Response to Atogepant for Migraine Prophylaxis Among Adults. *JAMA Netw Open*. Published June 08, 2022. doi:10.1001/jamanetworkopen.2022.15499

### Data

**Data available:** Yes

**Data types:** Deidentified participant data

**How to access data:** AbbVie is committed to responsible data sharing regarding the clinical trials we sponsor. This includes access to anonymized, individual and trial-level data (analysis data sets), as well as other information (e.g., protocols and Clinical Study Reports), as long as the trials are not part of an ongoing or planned regulatory submission. This includes requests for clinical trial data for unlicensed products and indications. This clinical trial data can be requested by any qualified researchers who engage in rigorous, independent scientific research, and will be provided following review and approval of a research proposal and Statistical Analysis Plan (SAP) and execution of a Data Sharing Agreement (DSA). Data requests can be submitted at any time and the data will be accessible for 12 months, with possible extensions considered. For more information on the process, or to submit a request, visit the following link: <https://www.abbvie.com/our-science/clinical-trials/clinical-trials-data-and-information-sharing/data-and-information-sharing-with-qualified-researchers.html>.

**When available:** With publication

### Supporting Documents

**Document types:** None

### Additional Information

**Who can access the data:** This clinical trial data can be requested by any qualified researchers who engage in rigorous, independent scientific research, and will be provided following review and approval of a research proposal and Statistical Analysis Plan (SAP) and execution of a Data Sharing Agreement (DSA).

**Types of analyses:** This clinical trial data can be requested by any qualified researchers who engage in rigorous, independent scientific research, and will be provided following review and approval of a research proposal and Statistical Analysis Plan (SAP) and execution of a Data Sharing Agreement (DSA).

**Mechanisms of data availability:** Data requests can be submitted at any time and the data will be accessible for 12 months, with possible extensions considered. For more information on the process, or to submit a request, visit the following link: <https://www.abbvie.com/our-science/clinical-trials/clinical-trials-data-and-information-sharing/data-and-information-sharing-with-qualified-researchers.html>.
