# Supplementary material for: Rates of Response to Atogepant for Migraine Prophylaxis Among Adults: A Secondary Analysis of a Randomized Clinical Trial
Source: PubMed Central journal article supplement — JAMA Netw Open. 2022 Jun 8;5(6):e2215499. doi: 10.1001/jamanetworkopen.2022.15499 (PMC9178435; doi:10.1001/jamanetworkopen.2022.15499), 2022-06-08
Supplement: jamanetwopen-e2215499-s002.pdf [file jamanetwopen-e2215499-s002.pdf]

## Supplementary Online Content

Lipton RB, Pozo-Rosich P, Blumenfeld AM, et al. Rates of response to atogepant for migraine prophylaxis among adults: a secondary analysis of a randomized clinical trial. *JAMA Netw Open*. 2022;5(6):e2215499. doi:10.1001/jamanetworkopen.2022.15499

**eTable 1.** Reduction in 100% in 3-Month Average of MMDs (Prespecified Sensitivity Analysis)

**eTable 2.** Reduction in 100% of MMDs by 4-Week Intervals (Prespecified Sensitivity Analysis)

**eTable 3.** Percentage of Participants Reporting Adverse Events (Safety Population)

**eTable 4.** Patient Global Impression of Change and Treatment Satisfaction After 12 Weeks of Randomized, Blinded Treatment

This supplementary material has been provided by the authors to give readers additional information about their work.

**eTable 1. Reduction in 100% in 3-Month Average of MMDs (Prespecified Sensitivity Analysis)**

|                                         |                           | Atogepant         |                    |                    |                     |
|-----------------------------------------|---------------------------|-------------------|--------------------|--------------------|---------------------|
|                                         |                           | Placebo (n = 214) | 10 mg QD (n = 214) | 30 mg QD (n = 223) | 60 mg QD (n = 222)  |
| <b>Original Analysis</b>                | <b>Responders, n (%)</b>  | 2 (0.9)           | 17 (7.9)           | 11 (4.9)           | 17 (7.7)            |
|                                         | <b>OR (95% CI vs PBO)</b> | –                 | 9.05 (2.06, 39.81) | 6.04 (1.32, 27.71) | 9.37 (2.13, 41.26)  |
|                                         | <b>P value</b>            | –                 | <b>.0036</b>       | <b>.0207</b>       | <b>.0031</b>        |
| <b>Sensitivity Analysis<sup>a</sup></b> | <b>Responders, n (%)</b>  | 2 (0.9)           | 18 (8.4)           | 11 (5.0)           | 20 (9.1)            |
|                                         | <b>OR (95% CI vs PBO)</b> | –                 | 9.62 (2.20, 42.10) | 5.90 (1.29, 27.01) | 11.03 (2.54, 47.94) |
|                                         | <b>P value</b>            | –                 | <b>.0026</b>       | <b>.0223</b>       | <b>.0014</b>        |

Abbreviations: CI, confidence interval; MMD, monthly migraine day; OR, odds ratio; PBO, placebo; QD, once daily.

<sup>a</sup>Includes day 29 to month 1 after removing day 1 and redefining month 2 and month 3 by shifting them by 1 day to ensure a 28-day assessment period.

**eTable 2. Reduction in 100% of MMDs by 4-Week Intervals (Prespecified Sensitivity Analysis)**

| Reduction of 100% in Average of MMDs, Weeks 1–4  |                    |                   |                    |                    |                    |
|--------------------------------------------------|--------------------|-------------------|--------------------|--------------------|--------------------|
|                                                  |                    | Atogepant         |                    |                    |                    |
|                                                  |                    | Placebo (n = 214) | 10 mg QD (n = 214) | 30 mg QD (n = 223) | 60 mg QD (n = 222) |
| Original Analysis                                | Responders, n (%)  | 8 (3.8)           | 30 (14.1)          | 26 (11.7)          | 42 (19.0)          |
|                                                  | OR (95% CI vs PBO) | –                 | 4.21 (1.88, 9.44)  | 3.63 (1.60, 8.26)  | 6.41 (2.92, 14.09) |
|                                                  | P value            | –                 | .0005              | .0021              | <.0001             |
| Sensitivity Analysis <sup>a</sup>                | Responders, n (%)  | 7 (3.3)           | 34 (16.0)          | 28 (12.6)          | 44 (20.1)          |
|                                                  | OR (95% CI vs PBO) | –                 | 5.62 (2.42, 13.08) | 4.55 (1.93, 10.74) | 7.81 (3.40, 17.91) |
|                                                  | P value            | –                 | <.0001             | .0006              | <.0001             |
| Reduction of 100% in Average of MMDs, Weeks 5–8  |                    |                   |                    |                    |                    |
|                                                  |                    | Atogepant         |                    |                    |                    |
|                                                  |                    | Placebo (n = 214) | 10 mg QD (n = 214) | 30 mg QD (n = 223) | 60 mg QD (n = 222) |
| Original Analysis                                | Responders, n (%)  | 17 (8.3)          | 43 (21.9)          | 39 (18.5)          | 50 (24.2)          |
|                                                  | OR (95% CI vs PBO) | –                 | 3.15 (1.73, 5.74)  | 2.66 (1.45, 4.89)  | 3.74 (2.07, 6.75)  |
|                                                  | P value            | –                 | .0002              | .0016              | <.0001             |
| Sensitivity Analysis <sup>a</sup>                | Responders, n (%)  | 20 (9.7)          | 46 (23.4)          | 43 (20.4)          | 51 (24.6)          |
|                                                  | OR (95% CI vs PBO) | –                 | 2.86 (1.62, 5.03)  | 2.53 (1.43, 4.48)  | 3.18 (1.82, 5.57)  |
|                                                  | P value            | –                 | .0003              | .0014              | <.0001             |
| Reduction of 100% in Average of MMDs, Weeks 9–12 |                    |                   |                    |                    |                    |
|                                                  |                    | Atogepant         |                    |                    |                    |
|                                                  |                    | Placebo (n = 214) | 10 mg QD (n = 214) | 30 mg QD (n = 223) | 60 mg QD (n = 222) |
| Original Analysis                                | Responders, n (%)  | 22 (11.2)         | 40 (21.3)          | 54 (27.1)          | 54 (27.7)          |
|                                                  | OR (95% CI vs PBO) | –                 | 2.27 (1.27, 4.06)  | 3.29 (1.88, 5.78)  | 3.10 (1.76, 5.45)  |
|                                                  | P value            | –                 | .0057              | <.0001             | <.0001             |
| Sensitivity Analysis <sup>a</sup>                | Responders, n (%)  | 22 (11.2)         | 40 (21.5)          | 53 (26.8)          | 56 (29.2)          |
|                                                  | OR (95% CI vs PBO) | –                 | 2.28 (1.27, 4.09)  | 3.28 (1.86, 5.78)  | 3.35 (1.90, 5.91)  |
|                                                  | P value            | –                 | .0059              | <.0001             | <.0001             |

Abbreviations: CI, confidence interval; MMD, monthly migraine day; OR, odds ratio; PBO, placebo; QD, once daily.

<sup>a</sup> Includes day 29 to month 1 after removing day 1 and redefining month 2 and month 3 by shifting them by 1 day to ensure a 28-day assessment period.

**eTable 3. Percentage of Participants Reporting Adverse Events (Safety Population)**

| n (%)                         | Placebo (n = 222) | Atogepant          |                    |                    |
|-------------------------------|-------------------|--------------------|--------------------|--------------------|
|                               |                   | 10 mg QD (n = 221) | 30 mg QD (n = 228) | 60 mg QD (n = 231) |
| ≥1 TEAE                       | 126 (56.8)        | 117 (52.9)         | 119 (52.2)         | 124 (53.7)         |
| ≥1 treatment-related TEAE     | 20 (9.0)          | 51 (23.1)          | 34 (14.9)          | 45 (19.5)          |
| AE leading to discontinuation | 6 (2.7)           | 9 (4.1)            | 4 (1.8)            | 6 (2.6)            |
| Treatment-emergent SAE        | 2 (0.9)           | 2 (0.9)            | 0                  | 0                  |
| Death                         | 0                 | 0                  | 0                  | 0                  |

Abbreviations: AE, adverse event; QD, once daily; SAE, serious adverse event; TEAE, treatment-emergent adverse event.

**eTable 4. Patient Global Impression of Change and Treatment Satisfaction After 12 Weeks of Randomized, Blinded Treatment**

| Responder Criteria, Week 12                                | Placebo (n=214) | Atogepant         |                   |                   |
|------------------------------------------------------------|-----------------|-------------------|-------------------|-------------------|
|                                                            |                 | 10 mg QD (n=214)  | 30 mg QD (n=223)  | 60 mg QD (n=222)  |
| <b>PGI-C,<sup>a</sup> n/N</b>                              | 95/206          | 145/201           | 153/209           | 162/213           |
| Percentage                                                 | 46.1%           | 72.1%             | 73.2%             | 76.1%             |
| OR (95% CI)                                                | –               | 3.05 (2.01, 4.61) | 3.33 (2.20, 5.05) | 3.83 (2.52, 5.84) |
| <i>P</i> value                                             |                 | <.0001            | <.0001            | <.0001            |
| <b>Satisfaction with study medication,<sup>b</sup> n/N</b> | 109/199         | 146/188           | 163/203           | 166/201           |
| Percentage                                                 | 54.8%           | 77.7%             | 80.3%             | 82.6%             |
| OR (95% CI)                                                | –               | 2.77 (1.81, 4.24) | 3.44 (2.23, 5.30) | 3.58 (2.31, 5.54) |
| <i>P</i> value                                             |                 | <.0001            | <.0001            | <.0001            |

Abbreviations: OR, odds ratio; PGI-C, Patient Global Impression of Change; QD, once daily.

<sup>a</sup>Response defined as “much better” or “very much better.”

<sup>b</sup>Response defined as “satisfied” or “extremely satisfied.”
